# Supplementary material for: Bone marrow endosteal stem cells dictate active osteogenesis and aggressive tumorigenesis
Source: PubMed Central journal article supplement (PMC10130060; doi:10.1038/s41467-023-38034-2), 2023-04-25
Supplement: 41467_2023_38034_MOESM3_ESM.pdf [file 41467_2023_38034_MOESM3_ESM.pdf]

## Reporting Summary

Nature Portfolio wishes to improve the reproducibility of the work that we publish. This form provides structure for consistency and transparency in reporting. For further information on Nature Portfolio policies, see our [Editorial Policies](#) and the [Editorial Policy Checklist](#).

### Statistics

For all statistical analyses, confirm that the following items are present in the figure legend, table legend, main text, or Methods section.

n/a Confirmed

- The exact sample size ( $n$ ) for each experimental group/condition, given as a discrete number and unit of measurement
- A statement on whether measurements were taken from distinct samples or whether the same sample was measured repeatedly
- The statistical test(s) used AND whether they are one- or two-sided  
*Only common tests should be described solely by name; describe more complex techniques in the Methods section.*
- A description of all covariates tested
- A description of any assumptions or corrections, such as tests of normality and adjustment for multiple comparisons
- A full description of the statistical parameters including central tendency (e.g. means) or other basic estimates (e.g. regression coefficient) AND variation (e.g. standard deviation) or associated estimates of uncertainty (e.g. confidence intervals)
- For null hypothesis testing, the test statistic (e.g.  $F$ ,  $t$ ,  $r$ ) with confidence intervals, effect sizes, degrees of freedom and  $P$  value noted  
*Give  $P$  values as exact values whenever suitable.*
- For Bayesian analysis, information on the choice of priors and Markov chain Monte Carlo settings
- For hierarchical and complex designs, identification of the appropriate level for tests and full reporting of outcomes
- Estimates of effect sizes (e.g. Cohen's  $d$ , Pearson's  $r$ ), indicating how they were calculated

*Our web collection on [statistics for biologists](#) contains articles on many of the points above.*

### Software and code

Policy information about [availability of computer code](#)

Data collection

ZEN 2 (blue edition, ZEISS), FACSDiva 8.0.1 (BD), Cell Ranger 2.2 (10X Genomics), TopHat and Bowtie2 in Tuxedo Suite v1.0, Scanco  $\mu$ CT Evaluation Program (SCANCO Medical AG)

Data analysis

ZEN 2 (blue edition, ZEISS), Image J 13.0.6 (NIH), FlowJo 9.9.6 (TreeStar), GraphPad Prism 8.4.3 (471), LIGER 1.0.0, velocity 0.17.17, scVelo 0.2.3, samtools 1.7, ggtern 3.3.0, MACS2 2.2.7.1, snapATAC 1.0, Homer 4.11.1, CopyKAT 0.1.0, InferCNV 1.6.0, Gorilla (no version), REViGO (no version), DESeq2 1.36.0, regioneR 1.28.0, karyoploteR 1.22.0, CopyNumberPlots 1.12.0, iPathwayGuide 1.4.0 (Advaita), Picard v2.18.9

For manuscripts utilizing custom algorithms or software that are central to the research but not yet described in published literature, software must be made available to editors and reviewers. We strongly encourage code deposition in a community repository (e.g. GitHub). See the Nature Portfolio [guidelines for submitting code & software](#) for further information.

### Data

Policy information about [availability of data](#)

All manuscripts must include a [data availability statement](#). This statement should provide the following information, where applicable:

- Accession codes, unique identifiers, or web links for publicly available datasets
- A description of any restrictions on data availability
- For clinical datasets or third party data, please ensure that the statement adheres to our [policy](#)

The single-cell RNA-seq, single-cell ATAC-seq and bulk RNA-seq data presented herein have been deposited in the National Center for Biotechnology Information (NCBI)'s Gene Expression Omnibus (GEO), and are accessible through GEO Series accession number, SuperSeries GSE185794, including GSE185785-GSE185793 and

GSM5623768-GSM5623790. Reference genome mm10 (Ensembl release 93) for transcript annotation is publicly available on Ensembl, including a gtf file [[http://ftp.ensembl.org/pub/release-93/gtf/mus\\_musculus/Mus\\_musculus.GRCm38.93.gtf.gz](http://ftp.ensembl.org/pub/release-93/gtf/mus_musculus/Mus_musculus.GRCm38.93.gtf.gz)] and a fasta file [[http://ftp.ensembl.org/pub/release-93/fasta/mus\\_musculus/dna/Mus\\_musculus.GRCm38.dna\\_sm.primary\\_assembly.fa.gz](http://ftp.ensembl.org/pub/release-93/fasta/mus_musculus/dna/Mus_musculus.GRCm38.dna_sm.primary_assembly.fa.gz)].

## Human research participants

Policy information about [studies involving human research participants and Sex and Gender in Research](#).

|                             |     |
|-----------------------------|-----|
| Reporting on sex and gender | N/A |
| Population characteristics  | N/A |
| Recruitment                 | N/A |
| Ethics oversight            | N/A |

Note that full information on the approval of the study protocol must also be provided in the manuscript.

## Field-specific reporting

Please select the one below that is the best fit for your research. If you are not sure, read the appropriate sections before making your selection.

Life sciences       Behavioural & social sciences       Ecological, evolutionary & environmental sciences

For a reference copy of the document with all sections, see [nature.com/documents/nr-reporting-summary-flat.pdf](https://nature.com/documents/nr-reporting-summary-flat.pdf)

## Life sciences study design

All studies must disclose on these points even when the disclosure is negative.

|                 |                                                                                                                                                                                                                                                                                                                                                                                                                                                                                                                   |
|-----------------|-------------------------------------------------------------------------------------------------------------------------------------------------------------------------------------------------------------------------------------------------------------------------------------------------------------------------------------------------------------------------------------------------------------------------------------------------------------------------------------------------------------------|
| Sample size     | No statistical method was used to predetermine sample size. We chose the numbers of mice based on the similar research in the field (NatCommun 11:332, 2020, NatCommun 13:4166, 2022). These sample size give good standard errors of the mean and good statistics to make it unlikely that we miss a biologically important difference between groups.                                                                                                                                                           |
| Data exclusions | Some of the data were excluded from the study because of the pre-established criteria such as problems or failures in identifying correct genotypes or birth dates, and issues unrelated to the intervention of the study such as spontaneous malnutrition. In any case, we consistently used littermate controls with corresponding genotypes in analysis.                                                                                                                                                       |
| Replication     | For all data presented in the manuscript, we examined at least three independent biological samples (three different mice) to ensure the reproducibility. For each series of the experiments, all attempts at replication were successful.                                                                                                                                                                                                                                                                        |
| Randomization   | The experiments were not randomized. We used all the available mice of the desired genotypes. Mice were allocated to particular groups based on results of PCR-genotyping typically performed around one week after birth. Covariates were controlled by considering multiple factors, such as genotypes and general phenotypical data (i.e. body weight). On principle, we did not observe any particular difference among groups.                                                                               |
| Blinding        | The investigators were not blinded to allocation during experiments and outcome assessment because it was impossible due to following reasons: samples were allocated to particular groups before experiments were initiated based on genotyping results, and given unique identifiers highlighting groups throughout experiments i.e. housing in cages, tissue collections, sample preparation and data acquisition. However, we did not pay particular attention to groups when we were measuring and counting. |

## Reporting for specific materials, systems and methods

We require information from authors about some types of materials, experimental systems and methods used in many studies. Here, indicate whether each material, system or method listed is relevant to your study. If you are not sure if a list item applies to your research, read the appropriate section before selecting a response.

## Materials &amp; experimental systems

|                                     |                                     |                               |
|-------------------------------------|-------------------------------------|-------------------------------|
| n/a                                 | <input type="checkbox"/>            | Involvement in the study      |
| <input checked="" type="checkbox"/> | <input checked="" type="checkbox"/> | Antibodies                    |
| <input checked="" type="checkbox"/> | <input type="checkbox"/>            | Eukaryotic cell lines         |
| <input checked="" type="checkbox"/> | <input type="checkbox"/>            | Palaeontology and archaeology |
| <input type="checkbox"/>            | <input checked="" type="checkbox"/> | Animals and other organisms   |
| <input checked="" type="checkbox"/> | <input type="checkbox"/>            | Clinical data                 |
| <input checked="" type="checkbox"/> | <input type="checkbox"/>            | Dual use research of concern  |

## Methods

|                                     |                                     |                          |
|-------------------------------------|-------------------------------------|--------------------------|
| n/a                                 | <input type="checkbox"/>            | Involvement in the study |
| <input checked="" type="checkbox"/> | <input type="checkbox"/>            | ChIP-seq                 |
| <input type="checkbox"/>            | <input checked="" type="checkbox"/> | Flow cytometry           |
| <input checked="" type="checkbox"/> | <input type="checkbox"/>            | MRI-based neuroimaging   |

## Antibodies

## Antibodies used

ThermoFisher/eBioscience  
 eFlour450-conjugated CD31 (390, Cat# 48-0311-82, Lot# 4301770)  
 eFlour450-conjugated CD45 (30F-11, Cat# 48-0451-82, Lot # 4295770)  
 eFlour450-conjugated Ter119 (TER-119, Cat# 48-5921-82, Lot# 4295840)  
 Allophycocyanin (APC)-conjugated CD31 (390, Cat# 17-0311-82, Lot# 4330203)  
 Allophycocyanin (APC)-conjugated CD45 (30F-11, Cat# 17-0451-82, Lot # 1966484)  
 Allophycocyanin (APC)-conjugated Ter119 (TER-119, Cat# 17-5921-82, Lot# 4295921)

ThermoFisher/Invitrogen  
 Alexa Fluor 647 donkey anti-rabbit IgG (H+L) (Cat# A31573, Lot# 1322326)  
 Alexa Fluor 647 donkey anti-goat IgG (H+L) (Cat# A21082, Lot# 1301819)

Abcam  
 Rabbit anti Cathepsin K polyclonal antibody (Cat# ab19027, Lot# GR189688-30)

Sigma  
 Rabbit anti perilipinA/B polyclonal antibody (Cat# P1873, Lot# 018M4869V)  
 Rabbit anti Aggrecan polyclonal antibody (Cat# AB1031, Lot# 3253326)

R & D systems  
 Goat anti ALPL polyclonal antibody (Cat# AF2910, Lot# WYM0116081)  
 Goat anti GAS1 polyclonal antibody (Cat# AF2644, Lot# VFH0120051)  
 Goat anti Gremlin polyclonal antibody (Cat# AF956, Lot# GBF0721071)  
 Goat anti LepR polyclonal antibody (Cat# AF497, Lot# BFU021610B)

Santa Cruz Biotechnology  
 Rabbit anti-FGFR3 polyclonal antibody (Cat# sc-123, Lot# J2315)

## Validation

All antibodies used here are commercially available. More detailed information about these antibodies is available on these manufacturers' websites. Briefly, Antibodies purchased from eBioscience were tested by flow cytometric analysis of mouse splenocytes and/or bone marrow cells. Antibodies from invitrogen were evaluated by Immunocytochemistry in A431 cells. Antibodies from Abcam were evaluated by Immunocytochemistry in mouse hepatocytes. Antibodies from Sigma were evaluated by Western Blot on Mouse Brain lysates. Antibodies from R&D systems were validated by immunohistochemistry in mouse embryonic tissue. Antibodies from Santa Cruz were validated by immunohistochemistry in HeLa cells.

## Animals and other research organisms

Policy information about [studies involving animals](#); [ARRIVE guidelines](#) recommended for reporting animal research, and [Sex and Gender in Research](#)

## Laboratory animals

We used genetically modified mice (*mus musculus*) for this study. Most of the mouse line have been backcrossed to C57BL/6 background. We used female breeder mice in a FVB/N background. Mice with both sexes were used throughout their lifespan (up to 2 years of age). Mouse strains used in the study were as following: Gas1-creER mice were generated in house, Rosa26-CAG-loxP-stop-loxP-tdTomato (Ai14: R26R-tdTomato, JAX007914), Rosa26-CAG-loxP-stop-loxP-ZsGreen (Ai6: R26R-ZsGreen, JAX007906), Prrx1-cre (JAX005584), Lepr-cre (JAX008320), Col2a1-creER (JAX006774), Fgfr3-icreER (JAX025809), Gli1-creER (JAX007913), Col1a1(2.3kb)-GFP (JAX013134), Osteocalcin-GFP (JAX017469), Osterix-mCherry (JAX024850), Ctnnb-floxed (JAX004152), Trp53-floxed (JAX008462), NOD scid gamma (NSG) (JAX005557), FVB/NJ (JAX001800) and C57BL/6J (JAX000664) mice were acquired from the Jackson laboratory. Fgfr3-GFP (MMRRC:031901-UCD) mice were acquired from the Mutant Mouse Resource and Research Centers. Osx-creER mice were provided from H.M. Kronenberg. Cxcl12GFP/+ mice were provided from Takashi Nagasawa. Animal rooms were climate controlled to provide temperatures of 22-23°C, 40-65% of humidity on a 12 h light/dark cycle.

## Wild animals

no wild animals were used in the study.

## Reporting on sex

Data has not been disaggregated for sex. The number provided in the Reporting Summary includes both male and female mice. For the mice analyzed during postnatal periods, information regarding sex has been collected; however, the data from both sexes were

|                         |                                                                                                                                                                                                                                                                                                                                              |
|-------------------------|----------------------------------------------------------------------------------------------------------------------------------------------------------------------------------------------------------------------------------------------------------------------------------------------------------------------------------------------|
|                         | aggregated.                                                                                                                                                                                                                                                                                                                                  |
| Field-collected samples | no field collected samples were used in the study.                                                                                                                                                                                                                                                                                           |
| Ethics oversight        | All procedures were conducted in compliance with the Guidelines for the Care and Use of Laboratory Animals approved by the University of Texas Health Science Center at Houston's Animal Welfare Committee (AWC), protocol AWC-21-0070, and the University of Michigan's Institutional Animal Care and Use Committee (IACUC), protocol 9496. |

Note that full information on the approval of the study protocol must also be provided in the manuscript.

## Flow Cytometry

### Plots

Confirm that:

- The axis labels state the marker and fluorochrome used (e.g. CD4-FITC).
- The axis scales are clearly visible. Include numbers along axes only for bottom left plot of group (a 'group' is an analysis of identical markers).
- All plots are contour plots with outliers or pseudocolor plots.
- A numerical value for number of cells or percentage (with statistics) is provided.

### Methodology

|                           |                                                                                                                                                                                                                                                                                                                                                                                                                                                                                                                                                                                                                                                                                                                                                                                                                                                                                  |
|---------------------------|----------------------------------------------------------------------------------------------------------------------------------------------------------------------------------------------------------------------------------------------------------------------------------------------------------------------------------------------------------------------------------------------------------------------------------------------------------------------------------------------------------------------------------------------------------------------------------------------------------------------------------------------------------------------------------------------------------------------------------------------------------------------------------------------------------------------------------------------------------------------------------|
| Sample preparation        | Soft tissues and epiphyses were carefully removed from dissected femurs. After removing distal epiphyseal growth plates and cutting off proximal ends, femurs were cut roughly and incubated with 2 Wunsch units of Liberase TM and 1mg of Pronase (Sigma/Roche 10165921001) in 2ml Ca <sup>2+</sup> , Mg <sup>2+</sup> -free HBSS at 37oC for 60 min on a shaking incubator (ThermomixerR, Eppendorf). After cell dissociation, cells were mechanically triturated using an 18-gauge needle with a 1ml Luer-Lok syringe (BD) and a pestle with a mortar (Coors Tek), and subsequently filtered through a 70µm cell strainer (BD) into a 50ml tube on ice to prepare single cell suspension. These steps were repeated for 5 times, and dissociated cells were collected in the same tube. Cells were pelleted and resuspended in an appropriate medium for subsequent purposes. |
| Instrument                | BD LSR Fortessa (BDBiosciences)                                                                                                                                                                                                                                                                                                                                                                                                                                                                                                                                                                                                                                                                                                                                                                                                                                                  |
| Software                  | FACSDiva v8.0.1 (BD) & FlowJo 9.9.6 (TreeStar) software                                                                                                                                                                                                                                                                                                                                                                                                                                                                                                                                                                                                                                                                                                                                                                                                                          |
| Cell population abundance | post-sort purity was not determined                                                                                                                                                                                                                                                                                                                                                                                                                                                                                                                                                                                                                                                                                                                                                                                                                                              |
| Gating strategy           | Single cells were first gated using FSC and SSC denominators. Negative 'unstained' control samples were always used as a reference to determine the demarcation between the positive and negative populations.                                                                                                                                                                                                                                                                                                                                                                                                                                                                                                                                                                                                                                                                   |

- Tick this box to confirm that a figure exemplifying the gating strategy is provided in the Supplementary Information.
